# Supplementary material for: Mortality in ICU Patients with COVID-19-Associated Pulmonary Aspergillosis
Source: MDPI journal article supplement (doi:10.3390/jof9060689), 2023-06-20
Supplement: s1 [file s1]

Supplementary material

# Mortality in ICU Patients with COVID-19-Associated Pulmonary Aspergillosis

**Table S1.** Comorbidities of 1,437 CAPA patients included in the review.

| Author, [reference number]<br>publication's year | Comorbidities                                                                                                                                                                                                                                                                                                            |
|--------------------------------------------------|--------------------------------------------------------------------------------------------------------------------------------------------------------------------------------------------------------------------------------------------------------------------------------------------------------------------------|
| Araya-Rojas[1],<br>2021                          | Chronic kidney disease 9.1%<br>Chronic obstructive pulmonary disease 9.1%<br>Diabetes mellitus 63.6%<br>Hypertension 45.4%<br>Neutropenia 9.1%<br>Obesity 63.6%                                                                                                                                                          |
| Bartoletti[2],<br>2021                           | Cerebrovascular disease 10%<br>Chronic kidney disease 20%<br>Chronic obstructive pulmonary disease 13%<br>Coronary disease 10%<br>Diabetes mellitus 17%<br>Hypertension 59%<br>Malignancies 7%<br>Obesity 37%<br>Solid organ transplant 3%                                                                               |
| Bentvelsen[3],<br>2022                           | Chronic obstructive pulmonary disease 25%<br>Immunocompromised 4.4%<br>Obesity 28.1%<br>Pulmonary disease 59.1%                                                                                                                                                                                                          |
| Bretagne[4],<br>2021                             | NA                                                                                                                                                                                                                                                                                                                       |
| Calderon-Parra[5], 2022                          | Chronic cardiac failure 21.4%<br>Chronic renal failure 25%<br>Chronic respiratory disease 48.1%<br>Diabetes mellitus 39.3%<br>Hematologic cancer 14.3%<br>Hypertension 64.3%<br>Immunocompromised 42.9%<br>Ischemic heart disease 21.4%<br>Liver cirrhosis 7.1%<br>Solid malignancy 7.1%<br>Solid organ transplant 17.9% |
| Casalini[6],<br>2022                             | Cardiovascular disorders 57.1%<br>Chronic kidney disease 4.2%<br>Diabetes 17.3%<br>Hepatic disorders 2.4%<br>Immune system disorders 4.2%<br>Obesity 35.7%                                                                                                                                                               |

|                        |                                                                                                                                                                                                                                                                                                             |
|------------------------|-------------------------------------------------------------------------------------------------------------------------------------------------------------------------------------------------------------------------------------------------------------------------------------------------------------|
|                        | Oncological disorders 8.3%<br>Respiratory disorders 10.1%                                                                                                                                                                                                                                                   |
| De Almeida[7],<br>2022 | Diabetes 57%<br>Heart disease 36%<br>Hypertension 50%<br>Cancer 21%<br>Chronic renal failure 7%<br>Chronic obstructive pulmonary disease 36%                                                                                                                                                                |
| Delliere[8],<br>2020   | Asthma 9.5%<br>Chronic obstructive pulmonary disease 0<br>Coronary disease 9.5%<br>Diabetes 42.9%<br>Hypertension 66.7%<br>Immunocompromised 9.5%<br>Obesity 19%                                                                                                                                            |
| Dupon[9],<br>2021      | Asthma 21.1%<br>Chronic obstructive pulmonary disease 21.1%<br>Chronic renal failure 10.5%<br>Diabetes 36.8%<br>Hypertension 36.8%<br>Obesity 5.3%<br>Solid cancer 15.8%                                                                                                                                    |
| Er[10],<br>2022        | Asthma 4.7%<br>Chronic obstructive pulmonary disease 9.3%<br>Chronic renal failure 18.6%<br>Collagen tissue disease 2.3%<br>Congestive heart failure 23.3%<br>Coronary artery disease 30.2%<br>Diabetes mellitus 37.2%<br>Hypertension 46.5%<br>Solid organ transplantation 2.3%<br>Solid organ tumor 23.3% |
| Erami[11],<br>2022     | Acute lymphoblastic leukemia 5.9%<br>Acute myeloblastic leukemia 11.7%<br>Chronic myeloblastic leukemia 5.9%<br>Diabetes mellitus 70.6%<br>Heart failure 29.4%<br>Kidney disorder 35.3%<br>Liver transplantation 17.6%                                                                                      |
| Ergun[12],<br>2021     | Autoimmune disease 5.1%<br>Cardiovascular disease 41%<br>Chronic kidney disease 2.6%<br>Diabetes mellitus 25.6%<br>Hematological malignancy 2.6%<br>Pulmonary disease 23.1%<br>Solid organ malignancy 10.3%<br>Solid organ transplant 2.6%<br>Stem cell transplant 2.6%                                     |
| Fischer[13],           | Asthma 0                                                                                                                                                                                                                                                                                                    |

|                       |                                                                                                                                                                                                                                                                                              |
|-----------------------|----------------------------------------------------------------------------------------------------------------------------------------------------------------------------------------------------------------------------------------------------------------------------------------------|
| 2022                  | Autoimmune disease 0<br>Cardiovascular disease 46.2%<br>Cerebrovascular disease 30.8%<br>Chronic obstructive pulmonary disease 15.4%<br>Diabetes 30.8%<br>Hematologic disease 7.7%<br>Hypertension 61.5%<br>Neoplasm 7.7%<br>Other pulmonary disease 0                                       |
| Fortun[14],<br>2023   | Active hematologic disorder 8%<br>Active solid tumor 5.8%<br>Chronic renal failure 10.9%<br>Diabetes mellitus 26.8%<br>Hepatic insufficiency (acute or chronic) 10.9%<br>Progenitor hematologic transplant 2.9%<br>Renal insufficiency (acute or chronic) 35%<br>Solid organ transplant 1.4% |
| Gangneux[15],<br>2022 | Asthma 7%<br>Chronic obstructive pulmonary disease 11%<br>Diabetes 34%<br>Dyslipidemia 3%<br>Hypertension 47%<br>Immunodepression 14%<br>Solid organ transplantation 11%                                                                                                                     |
| Giacobbe[16],<br>2022 | NA                                                                                                                                                                                                                                                                                           |
| Giusiano[17],<br>2022 | Chronic obstructive pulmonary disease 10.5%<br>Diabetes 31.6%<br>Emphysema 5.3%<br>HIV infection 5.3%<br>Hypertension 47.4%<br>Lymphoma 5.3%<br>Obesity 26.3%<br>Renal insufficiency 5.3%<br>Ulcerative colitis 5.3%<br>Vasculitis 5.3%                                                      |
| Hashim[18],<br>2022   | Chronic kidney disease 7.7%<br>Chronic liver disease 5.4%<br>Chronic pulmonary disease 23%<br>Coronary artery disease 7.7%<br>Diabetes mellitus 60.3%<br>HIV infection 1.4%<br>Hypertension 45.9%<br>Malignancy 2.7%<br>Renal transplantation 2.7%                                           |
| Hatzl[19],<br>2021    | NA                                                                                                                                                                                                                                                                                           |
| Huang[20],<br>2022    | Chronic airway diseases 0<br>Chronic kidney diseases 27%<br>Cirrhosis 9%<br>Diabetes mellitus 45%                                                                                                                                                                                            |

|                       |                                                                                                                                                                                                                                                                                                              |
|-----------------------|--------------------------------------------------------------------------------------------------------------------------------------------------------------------------------------------------------------------------------------------------------------------------------------------------------------|
|                       | Malignancies 9%                                                                                                                                                                                                                                                                                              |
| Iqbal[21],<br>2021    | Diabetes mellitus 73.8%<br>Cirrhosis 8.2%<br>Hypertension 49.2%<br>Malignancy 21.3%                                                                                                                                                                                                                          |
| Janssen[22],<br>2021  | Asthma 2%<br>Cardiovascular disease 60%<br>Chronic obstructive pulmonary disease 19%<br>Diabetes mellitus 21%<br>HIV/AIDS 7%<br>Liver cirrhosis 0<br>Rheumatological disease 12%<br>Solid organ malignancy 7%                                                                                                |
| Kim[23],<br>2022      | Diabetes mellitus 23.5%<br>Hypertension 64.7%<br>Chronic heart disease 11.8%<br>Chronic lung disease 29.4%<br>Chronic kidney disease 0<br>Malignancy 5.9%<br>Chronic hepatitis 0<br>Neurologic disease 5.9%                                                                                                  |
| Koukaki[24],<br>2022  | Chronic respiratory diseases 14.3%<br>Diabetes 14.3%<br>Hypertension 35.7%<br>Hypothyroidism 7.1%<br>Immunosuppression 21.4%                                                                                                                                                                                 |
| Lahmer[25],<br>2021   | Asthma 0<br>Atrial fibrillation 9%<br>Chronic obstructive pulmonary disease 18%<br>Coronary heart disease 9%<br>Chronic kidney disease 9%<br>Diabetes mellitus 27%<br>Hypertension 63%                                                                                                                       |
| Lee[26],<br>2022      | Chronic kidney disease 20%<br>Chronic liver disease 20%<br>Chronic obstructive pulmonary disease 20%<br>Diabetes mellitus 50%<br>Heart failure 10%<br>Hematologic malignancies 20%<br>History of hematopoietic stem cell transplantation 10%<br>History of solid organ transplantation 0<br>Solid cancer 10% |
| Leistner[27],<br>2022 | AIDS/HIV 0<br>Cancer 11%<br>Diabetes mellitus 32%<br>Heart disease 15%<br>Liver disease 23%<br>Lung disease 40%<br>Peptic ulcer 4%<br>Renal disease 87%<br>Rheumatic disease 4%                                                                                                                              |

|                         |                                                                                                                                                                                                                                                                                                                                                                                                                                                                                                                                                                                                                                                                                                                                                                                                                                                                                                                       |
|-------------------------|-----------------------------------------------------------------------------------------------------------------------------------------------------------------------------------------------------------------------------------------------------------------------------------------------------------------------------------------------------------------------------------------------------------------------------------------------------------------------------------------------------------------------------------------------------------------------------------------------------------------------------------------------------------------------------------------------------------------------------------------------------------------------------------------------------------------------------------------------------------------------------------------------------------------------|
|                         | Neurologic disease 6%<br>Vascular disease 17%                                                                                                                                                                                                                                                                                                                                                                                                                                                                                                                                                                                                                                                                                                                                                                                                                                                                         |
| Marta[28],<br>2022      | Cardiovascular disease 31.4%<br>Chronic pulmonary disease 22.8%<br>Diabetes mellitus 25.7%<br>Dyslipidemia 51.4%<br>Hypertension 65.7%<br>Obesity 34.3%                                                                                                                                                                                                                                                                                                                                                                                                                                                                                                                                                                                                                                                                                                                                                               |
| Melchers[29],<br>2022   | Active oncologic disease 15%<br>Cardiac disease 62%<br>Chronic respiratory disease 31%<br>Diabetes mellitus 62%<br>Renal insufficiency 15%                                                                                                                                                                                                                                                                                                                                                                                                                                                                                                                                                                                                                                                                                                                                                                            |
| Permpalung[30],<br>2022 | Alcohol abuse 2.6%<br>Anemia, blood loss 10.3%<br>Anemia, nutritional deficiency 71.8%<br>Chronic pulmonary disease 41%<br>Coagulopathy 51.3%<br>Congestive heart failure 46.2%<br>Depression 30.8%<br>Diabetes mellitus complicated 38.5%<br>Diabetes mellitus uncomplicated 38.5%<br>Drug abuse 7.7%<br>Fluid and electrolytic disorders 97.4%<br>HIV/AIDS 2.6%<br>Hypertension 74.4%<br>Hypertension complicated 56.4%<br>Hypothyroidism 10.3%<br>Liver disease 35.9%<br>Lymphoma 2.6%<br>Monoclonal gammopathy 0<br>Multiple myeloma 5.1%<br>Obesity 41%<br>Other neurologic disorders 53.8%<br>Paralysis 17.9%<br>Peptic ulcer disease excluding bleeding 7.7%<br>Peripheral vascular disorders 15.4%<br>Pulmonary vascular diseases 41%<br>Psychosis 12.8%<br>Renal failure 43.6%<br>Rheumatoid arthritis/collagen vascular diseases 2.6%<br>Solid organ transplant 0<br>Solid tumor 25.6%<br>Weight loss 35.9% |
| Prattes[31],<br>2022    | Active malignant disease 10.3%<br>Cardiovascular disease 57.8%<br>Diabetes mellitus 29.4%<br>History of smoking 13.3%<br>Obesity 28.2%<br>Pulmonary disease 23.9%                                                                                                                                                                                                                                                                                                                                                                                                                                                                                                                                                                                                                                                                                                                                                     |

|                              |                                                                                                                                                                                                                                                                                                                                                        |
|------------------------------|--------------------------------------------------------------------------------------------------------------------------------------------------------------------------------------------------------------------------------------------------------------------------------------------------------------------------------------------------------|
|                              | Solid organ transplantation 4.9%                                                                                                                                                                                                                                                                                                                       |
| Ranhel[32],<br>2021          | Alzheimer's disease 10%<br>Atrial fibrillation 10%<br>Chronic obstructive pulmonary disease 30%<br>Diabetes mellitus 20%<br>Dyslipidemia 30%<br>Hypertension 50%<br>Hypothyroidism 30%<br>Mono nephrectomy 10%<br>Nephropathy 10%<br>Obesity 20%<br>Osteoporosis 20%<br>Psoriasis 10%<br>Solid organ transplantation 30%<br>Sjogren syndrome 10%       |
| Rouze[33],<br>2022           | Diabetes mellitus 28.6%<br>Chronic heart failure 0<br>Chronic kidney disease 7.1%<br>Chronic respiratory failure 7.1%<br>Cirrhosis 0<br>Chronic obstructive pulmonary disease 14.3%<br>Heart disease 14.3%<br>Hematologic malignancy 7.1%<br>HIV 0<br>Immunosuppression 14.3%<br>Immunosuppressive drugs 14.3%<br>Organ transplant 0<br>Solid cancer 0 |
| Sivasubramanian[34],<br>2021 | Coronary artery disease 35%<br>Diabetes mellitus 64%<br>Hypertension 79%<br>Liver disease 12%<br>Lung disease 25%<br>Obesity 45%<br>Renal disease 25%<br>Stroke/dementia 22%                                                                                                                                                                           |
| Velez Pintado[35],<br>2021   | Cancer 19%<br>Chronic obstructive pulmonary disease 6%<br>Diabetes mellitus 31%<br>Hypertension 25%<br>Obesity 38%<br>Overweight 50%                                                                                                                                                                                                                   |
| White[36],<br>2020           | Alzheimer's disease 4%<br>Autoimmune disease 8%<br>Cardiac disease 4%<br>Chronic kidney disease 8%<br>Chronic respiratory illness 48%<br>Diabetes mellitus 24%<br>Essential thrombocythemia 4%<br>Hematologic malignancy 4%<br>Hypertension 32%                                                                                                        |

|                    |                                                                                                                                                                                                                                                                                                                                        |
|--------------------|----------------------------------------------------------------------------------------------------------------------------------------------------------------------------------------------------------------------------------------------------------------------------------------------------------------------------------------|
|                    | <p>Liver disfunction 4%</p> <p>Obesity 24%</p> <p>Solid cancer 20%</p> <p>Vasculitis 4%</p>                                                                                                                                                                                                                                            |
| Xu[37],<br>2021    | <p>Autoimmune disease 3.3%</p> <p>Cerebrovascular disease 12.8%</p> <p>Chronic cardiac disease 16.7%</p> <p>Chronic kidney disease 3.9%</p> <p>Chronic liver disease 6.4%</p> <p>Chronic pulmonary disease 6.4%</p> <p>Coronary disease 10.3%</p> <p>Diabetes mellitus 48.7%</p> <p>Hypertension 48.7%</p> <p>Liver cirrhosis 1.3%</p> |
| Zhang[38],<br>2021 | <p>Asthma 18%</p> <p>Chronic obstructive pulmonary disease 24%</p> <p>Diabetes mellitus 36%</p> <p>End stage renal disease 12%</p> <p>Hyperlipidemia 21%</p> <p>Hypertension 58%</p> <p>Obesity 21%</p>                                                                                                                                |
